# Supplementary material
Source: Research Square preprint supplement (doi:10.21203/rs.3.rs-9349136/v1)
Supplement: Supplementary file 1 [file e704e6d8d995060ef4352c07.pdf]

# eAppendix

Fertility Impacts of the Dobbs Decision across the Rural-Urban Continuum

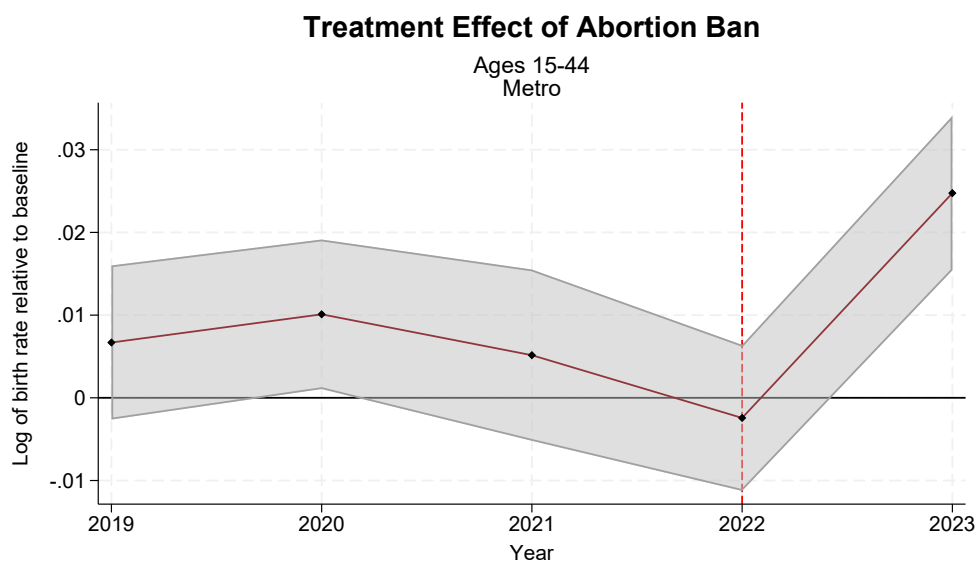

**Figure e1:** Treatment Effect of Abortion Ban on Birth Rates: Ages 15–44, Metropolitan Areas (Non-Texas Ban States)

*Note.* Figure shows the difference in log birth rates between ban states and their synthetic control. Vertical red dashed line indicates treatment timing (2022). Shaded area represents 95% confidence intervals.

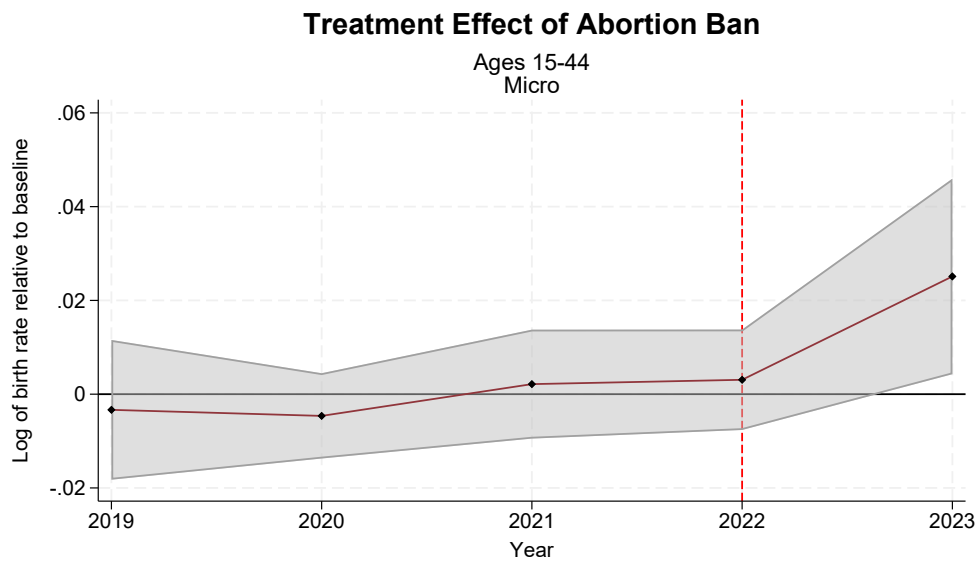

**Figure e2:** Treatment Effect of Abortion Ban on Birth Rates: Ages 15–44, Micropolitan Areas (Non-Texas Ban States)

*Note.* Figure shows the difference in log birth rates between ban states and their synthetic control. Vertical red dashed line indicates treatment timing (2022). Shaded area represents 95% confidence intervals.

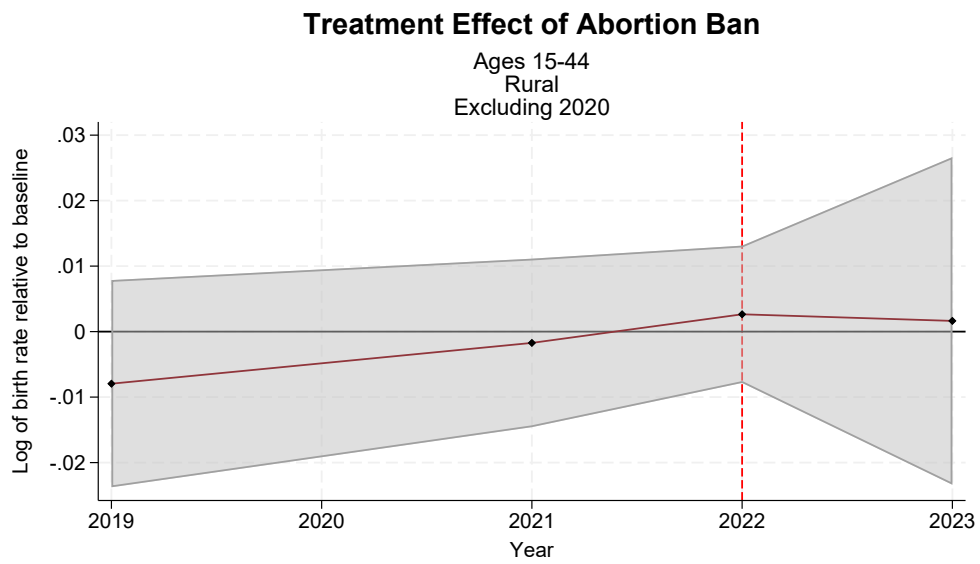

**Figure e3:** Treatment Effect of Abortion Ban on Birth Rates: Ages 15–44, Rural Areas (Non-Texas Ban States, Excluding 2020)

*Note.* This figure excludes 2020 to address COVID-19-related measurement concerns. Results including 2020 are provided in eFigure 7.

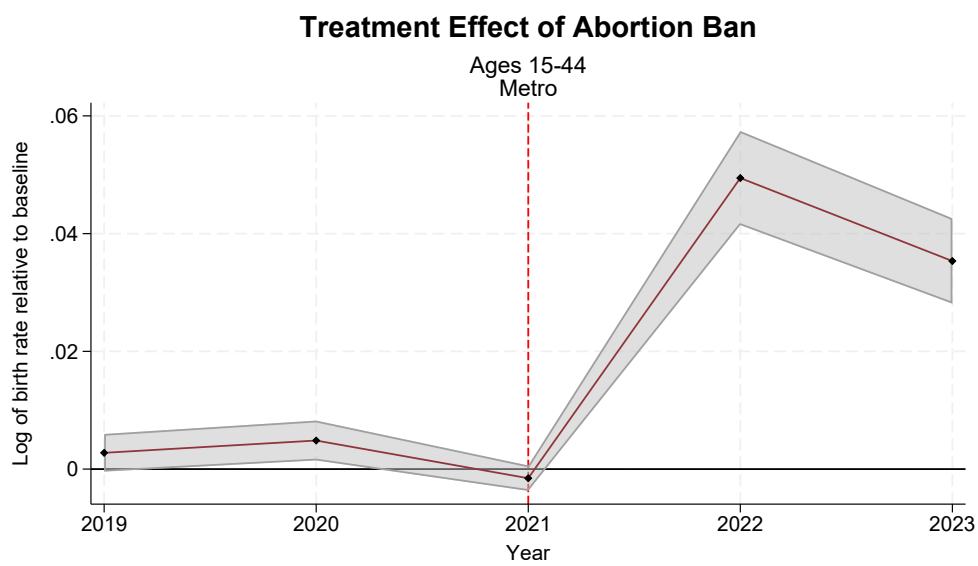

**Figure e4:** Treatment Effect of Abortion Ban on Birth Rates: Ages 15–44, Metropolitan Areas (Texas)

*Note.* Because the Texas Heartbeat ban took effect in 2021, there are 2 years post-treatment. Vertical red dashed line indicates treatment timing (2021). Shaded area represents 95% confidence intervals.

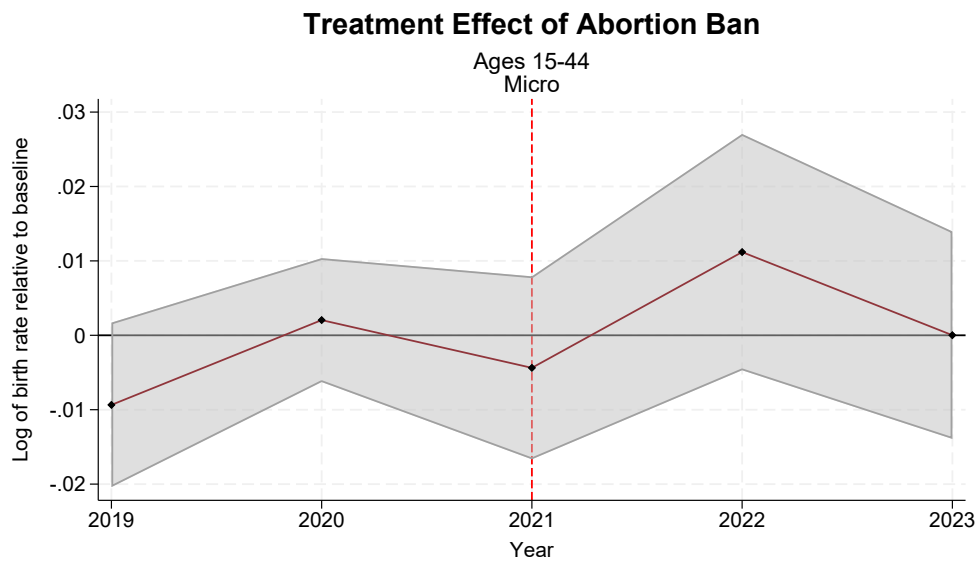

**Figure e5:** Treatment Effect of Abortion Ban on Birth Rates: Ages 15–44, Micropolitan Areas (Texas)

*Note.* Vertical red dashed line indicates treatment timing (2021). Shaded area represents 95% confidence intervals.

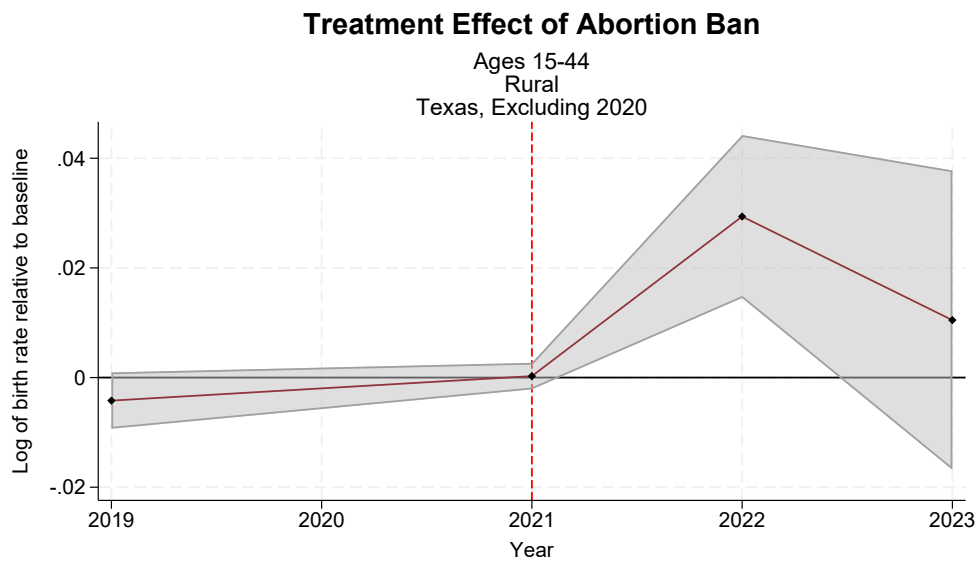

**Figure e6:** Treatment Effect of Abortion Ban on Birth Rates: Ages 15–44, Rural Areas (Texas)  
*Note.* Vertical red dashed line indicates treatment timing (2021). Shaded area represents 95% confidence intervals.

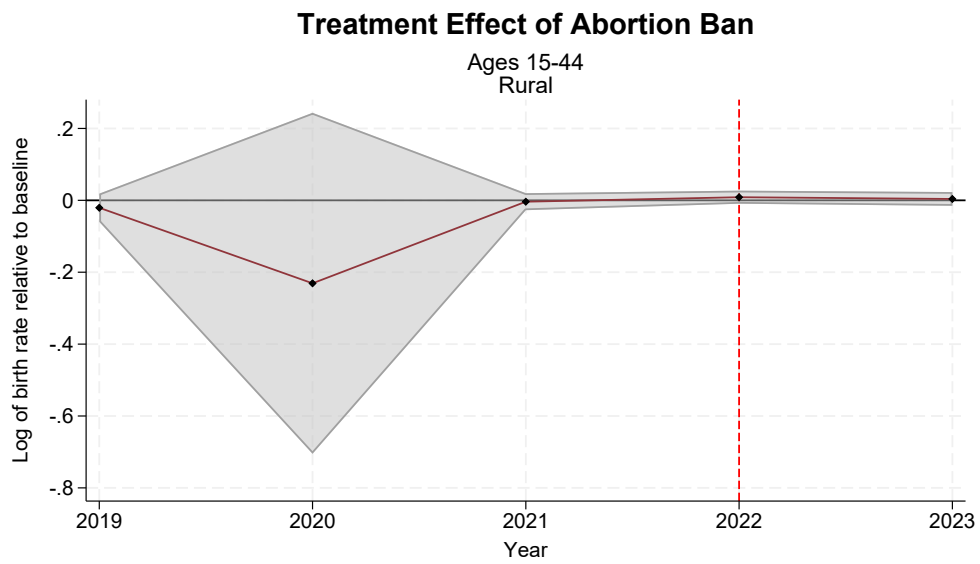

**Figure e7:** Treatment Effect of Abortion Ban on Birth Rates: Ages 15–44, Rural Areas Including 2020 (Non-Texas Ban States)

*Note.* This figure includes 2020 in the analysis. The main text presents results excluding 2020 due to COVID-19-related measurement concerns.

**Table e1:** Rural Counties: Comparison of Models Excluding and Including 2020 (Non-Texas States)

|                                | All              | 15–19            | 20–24            | 25–34             | 35+               | White             | Black              |
|--------------------------------|------------------|------------------|------------------|-------------------|-------------------|-------------------|--------------------|
| <b>Panel A: Excluding 2020</b> |                  |                  |                  |                   |                   |                   |                    |
| ATT                            | 0.002<br>(0.013) | 0.427<br>(0.401) | 0.022<br>(0.014) | −0.006<br>(0.018) | −0.014<br>(0.032) | −0.006<br>(0.016) | −0.221<br>(0.168)  |
| N (state-years)                | 128              | 128              | 128              | 128               | 128               | 128               | 128                |
| Total births (000s)            | 488              | 30               | 127              | 271               | 60                | 416               | 36                 |
| <b>Panel B: Including 2020</b> |                  |                  |                  |                   |                   |                   |                    |
| ATT                            | 0.004<br>(0.011) | 0.433<br>(0.327) | 0.021<br>(0.016) | −0.005<br>(0.019) | −0.036<br>(0.025) | −0.005<br>(0.014) | −0.260*<br>(0.106) |
| N (state-years)                | 160              | 160              | 160              | 160               | 160               | 160               | 160                |
| Total births (000s)            | 609              | 38               | 160              | 338               | 74                | 517               | 45                 |

*Note.* ATT = average treatment effect on the treated. Panel A excludes 2020 from the analysis due to COVID-19-related population measurement concerns (main specification used in Table 1, Panel C). Panel B includes 2020. Results are substantively similar across specifications. Total births are cumulative across all years in sample.

\*  $P < .05$ ; \*\*  $P < .01$ ; \*\*\*  $P < .001$ .
